# Supplementary material for: Sinomenium acutum Modulates Platelet Aggregation and Thrombus Formation by Regulating the Glycoprotein VI-Mediated Signalosome in Mice
Source: MDPI journal article supplement (doi:10.3390/ph17010006), 2023-12-20
Supplement: s1 [file s1]

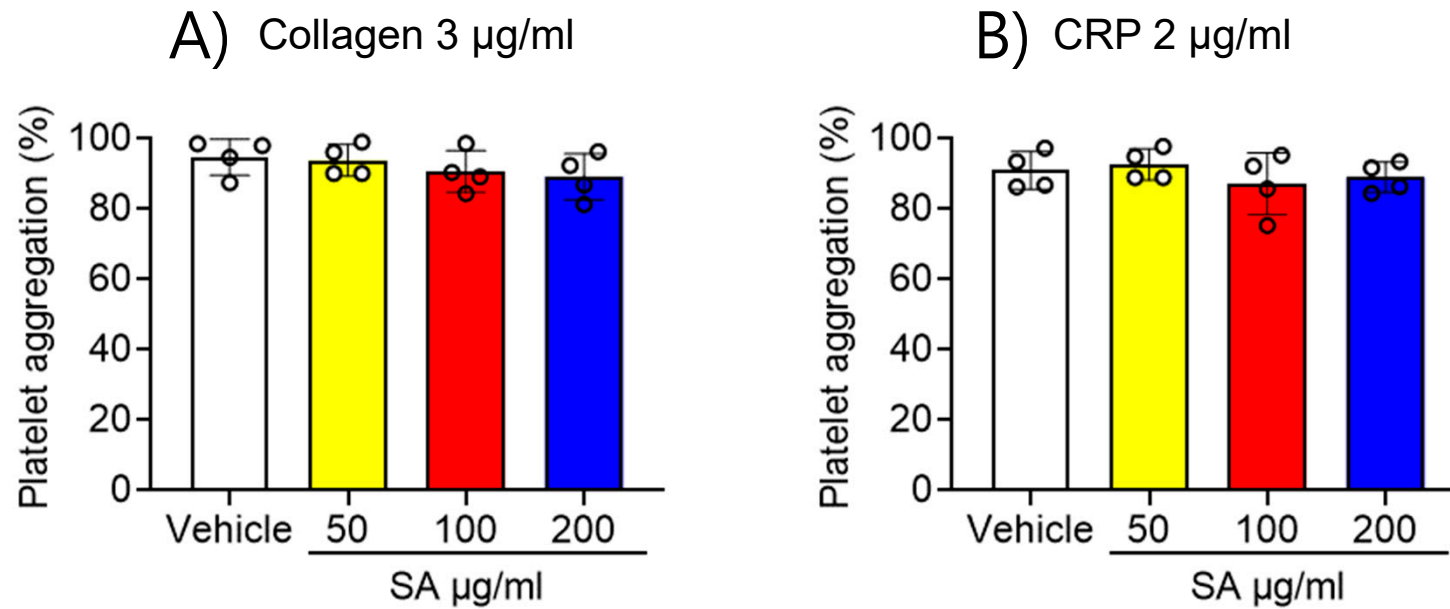

**Figure. S1. Role of *Sinomenium acutum* (SA) in platelet aggregation following collagen and CRP stimulation.** Washed platelets were preincubated with various concentrations of SA (50, 100, and 200 µg/mL) for 10 minutes at 37°C and then stimulated with 3 µg/ml Collagen (A) and 2 µg/ml CRP (B). Data represent the mean ± SD (n = 4).

Supplementary Table S1. Coagulation parameters in SA treatment.

|                   | <b>Control level</b> | <b>Mean <math>\pm</math> SD</b> |
|-------------------|----------------------|---------------------------------|
| <b>PT (Sec)</b>   | Vehicle              | 6.7 $\pm$ 0.24                  |
|                   | SA 50 mg/kg          | 6.7 $\pm$ 0.25                  |
|                   | SA 100 mg/kg         | 6.6 $\pm$ 0.25                  |
| <b>aPTT (Sec)</b> | Vehicle              | 37.1 $\pm$ 4.12                 |
|                   | SA 50 mg/kg          | 38.8 $\pm$ 6.26                 |
|                   | SA 100 mg/kg         | 38.6 $\pm$ 4.44                 |

Coagulation parameters from oral administration (7 days) of the vehicle and/or SA (50 and 100 mg/kg, BW) mice were measured using a coagulation analyzer (ACL 7000, Instrumentation laboratory comp. Bedford, MA, USA). Data represent the mean  $\pm$  SD (n = 3 mice per group). There was no significant difference in prothrombin time (PT) and activated partial thromboplastin time (APTT) in the SA treatment, compared to the control group. PT: prothrombin time; aPTT: activated partial thromboplastin time; Sec: second.
